1

2

3 Validity of Optical Heart Rate Measurement in Commercially Available  
4 Wearable Fitness Tracking Devices

5

6

7 Jason Thomas<sup>1\*</sup>, Patrick Doyle<sup>1</sup> , J. Andrew Doyle<sup>1</sup>

8

9

10

11 <sup>1</sup> Department of Kinesiology and Health, College of Education and Human Development, Georgia State  
12 University, Atlanta, Georgia, United States of America

13 <sup>2</sup> Current Address: Institute for Disaster Management, College of Public Health, University of Georgia,  
14 Athens, Georgia, United States of America

15

16 \* Corresponding author

17 E-mail: [jthomas31@gsu.edu](mailto:jthomas31@gsu.edu)

18

## 19 Abstract

20 **Background:** Wearable fitness tracking devices have risen in popularity for athletes and the general  
21 population and are increasingly integrated into smartwatch technology. Many devices incorporate  
22 optical heart rate (HR) measurement by photoplethysmography which provides data used to monitor  
23 and track exercise training intensities, progress, and other health and fitness related parameters.

24 **Objective:** To determine the validity of optical heart rate measurement in three fitness tracking devices  
25 while resting, walking, and running.

26 **Methods:** Twenty subjects (10 male, 10 female) completed the research study based on the ANSI/CTI  
27 standards for physical activity monitoring of heart rate under 4 different conditions: sedentary (SED),  
28 treadmill walking (WLK), running (RUN), and dynamic running/walking (DYN). Subjects wore 3 optical  
29 heart rate devices: Polar OH1 (OH1) on the right forearm, Apple Watch 4 (AW4) on the right wrist and  
30 Garmin Forerunner 945 (FR945) on the left wrist. A Polar H10 (H10), a chest strap device, was the  
31 criterion HR measurement device. SED, WLK, and RUN were all 7-minute protocols with 1 minute of  
32 standing, 5 minutes of prescribed activity, and 1 final minute of standing. The DYN protocol was a 12-  
33 minute protocol with 1 minute of standing, 10 minutes of variable intensity walking and running, and 1  
34 minute of standing. Raw HR data was extracted from each device and temporally aligned with the  
35 criterion H10 HR data for analysis.

## 36 Results:

37 The mean absolute deviation (MAD, measured in beats per minute) for the three experimental devices  
38 (OH1, AW4, FR945, respectively) for SED was 1.31, 1.33, and 2.03; for WLK was 2.79, 2.58, and 5.19; for  
39 RUN were 4.00, 4.29, and 6.51; and for DYN was 2.60, 2.44, and 2.44. The mean absolute percent error  
40 (MAPE) for the three experimental devices (OH1, AW4, FR945, respectively) for SED was 1.78%, 1.89%,

41 and 2.81%; for WLK was 3.15%, 3.18%, and 5.93%; for RUN was 3.43%, 3.51%, and 5.25%; and for DYN  
42 was 2.05%, 1.95%, and 5.47%. The intraclass correlation for each device across all conditions was .991  
43 (OH1), .984 (AW4), and .697 (FR945).

44 **Conclusions:** At rest, and during both steady-state and variable-speed treadmill walking and running, the  
45 Polar OH1, Garmin Forerunner 945, and Apple Watch 4 optical HR monitors demonstrated a level of  
46 accuracy well within that required by the ANSI/CTA Standard (2018) for physical activity monitoring  
47 devices for heart rate measurement (i.e., <10% Mean Absolute Percent Error). Therefore, consumers  
48 can have confidence that these devices provide HR data with accuracy that conforms to the  
49 performance criteria recommended for consumer electronics.

50 **Keywords:** photoplethysmography; heart rate monitor; smartwatch; fitness tracking device

51 [Introduction](#)

52 [Background](#)

53 Wearable fitness tracking devices have risen in popularity over the past decade and have been the top  
54 fitness trend numerous years while approaching nearly a \$100 billion industry (1). These devices were  
55 initially developed as either rudimentary mechanical pedometers attached to a shoe or waist band, or  
56 electrode chest strap heart rate monitors that are often deemed uncomfortable and cumbersome. As  
57 technology has advanced, wearable fitness devices have integrated improved technologies including  
58 GPS, accelerometers, altimeters, and photosensors. Further, they are increasingly integrated into more  
59 user-friendly and comfortable devices, specifically wrist-worn watches, and arm bands. As heart rate  
60 (HR) monitoring is arguably the key component of fitness monitoring, a principle technological advance  
61 has been the integration of photoplethysmography (PPG), which uses a light emitting diode and  
62 photosensor to measure microvascular blood volume changes which is consequently associated with  
63 heart rate (2).

64 The advancement and integration of PPG technology into wrist-worn devices has granted the end-user  
65 with a wealth of information including caloric expenditure, oxygen consumption ( $VO_2$ ), heart rate  
66 variability, sleep patterns, recovery, and training intensity. All this information provided to users is  
67 based on manufacturer-specific algorithms computed from heart rate collected via PPG technology.  
68 Therefore, the validity of the heart rate measurement from these PPG devices is of key importance.

69 Several studies have been completed to assess the validity of a variety of activity tracking devices which  
70 use the PPG technology. Although several devices, including the OH1, Apple Watch series, and Garmin  
71 Forerunner series, have been deemed valid, the results of the studies must be interpreted narrowly as  
72 various methodological differences or concerns exist between studies. As device availability has grown  
73 immensely and rapidly, the current body of research lacks results that can more confidently discern the  
74 validity of the devices across the general population.

75 The OH1 has been previously studied and was deemed valid for moderate and high intensity activities  
76 (3, 4), appeared more valid compared to a wrist-based device by the same manufacturer(5), and  
77 showed decreased validity with arm-based activities (i.e. tennis) (6). A key limitation of these studies is  
78 the application of the study results to the wider population as the studies lacked balanced diversity in  
79 either BMI, skin tone, or sex. Likewise, studies using the Apple Watch series have suggested device  
80 validity, but different methodological issues exist. The methodological concerns were comprised of  
81 various issues such as recording heart rate from a single timepoint (7), using a model of tachycardia (8),  
82 implementing a single subject design (9), or failing to report key validity metrics such as MAD, MAPE,  
83 and ICC (10). Additionally, these studies also lacked the diversity in key subject demographics, similar to  
84 the limitations with OH1 research. The Garmin Forerunner series has a very limited amount of  
85 information available in the literature. The existing data has either suggested poor validity in prior  
86 versions to the FR945 (7) or has suffered from methodological issues related to heart rate recording  
87 frequency (11).

88 Aside from specific device validity, the current body of research for all PPG activity tracking devices  
89 suffers from numerous methodological differences that limits our ability to apply the results to the  
90 general population. Existing studies generally lack cohesion between different exercise types,  
91 intensities, and durations. Some studies have been completed to assess the validity of a single device  
92 across multiple exercise modalities (4), while others have researched numerous devices across a variety  
93 of intensities and exercise modalities, but with shorter data recording times (12). More recent studies  
94 have investigated multiple devices, but intensity was extremely high and duration extremely short (13).  
95 Other studies have utilized different modes of exercise but lacked varying levels of intensity within the  
96 modes (14, 15). A recent study implemented activity modes and intensity with a better variation, but  
97 only incorporated a single demographic (Caucasian) in the subject group (10)

98 The lack of variation in subject demographics is visible across many studies. Variations in skin tone, BMI,  
99 sex, and age have been suggested as potential confounding factors to proper validity testing for PPG  
100 technology. Variations in skin tone appears to affect validity as use of a typical green-light LED diode  
101 (often integrated into many devices) has resulted in a 1.04 BPM error rate in light-skinned individuals,  
102 and as much as a 10.9 BPM error in dark-skinned individuals (16). There is also evidence to suggest that  
103 as BMI increases, PPG waveform can change as much as 43% between obese and non-obese individuals  
104 (17). Some studies have attempted to address these concerns but have had limitations. For instance, a  
105 recent study did investigate skin tone and PPG using an Apple Watch, but the study subjects only  
106 represented 3 of the 6 Fitzpatrick skin tone designations (18). Another study had all 6 skin tones  
107 represented, but only had 10 subjects total such that certain skin tones were only represented by a  
108 single subject (19). Additionally, few studies have specifically recruited subjects to represent a diversity  
109 in BMI or gender.

110 Recently, the American National Standards Institute (ANSI) and Consumer Technology Association (CTA)  
111 developed the ANSI/CTA standards for investigating the validity and reliability of consumer electronic

112 fitness devices. These standards provide a consistent, balanced, and equitable basis for subject  
113 selection and activity parameters so that consumer devices can be evaluated in a standardized manner.  
114 The activity parameters outline optimal intensity levels and duration for different modes of activity.  
115 Additionally, subject selection requirements ensure a diverse population relative to age, gender, body  
116 mass, and skin tone or complexion.

## 117 Study Objective

118 PPG technology is being widely implemented to determine HR in an increasing number of devices to  
119 appeal to a broader market of consumers globally. As such, it is important to determine if the existing  
120 device validity evidenced by previous studies is representative of a diverse population and activities or if  
121 the results can only be applied to the limited subject demographics and activities of the respective  
122 studies. Therefore, the purpose of this study is to evaluate the heart rate measurement validity of three  
123 consumer photoplethysmographic heart rate monitors compared to an accepted criterion device in  
124 accordance with current standards of ANSI/CTI.

## 125 Methods

### 126 Participants

127 Twenty healthy subjects (10 males and 10 females) voluntarily completed the study. Subject  
128 characteristics are presented in Table 2. All subjects were educated on the risks of the procedures and  
129 gave informed consent prior to the start of the protocols. Subjects were recruited verbally from faculty,  
130 staff, and students within the university or by e-mail through a local running club. The study was  
131 approved by the Institutional Review Board of Georgia State University.

### 132 Devices

133 Four heart rate measurement devices, three experimental and one criterion device, were used for this  
134 study. All devices were updated with the most recent software and firmware prior to the start of the

135 study. No further updates were installed on the devices during the data collection period so that  
136 firmware and software remained consistent throughout the study. The criterion device was the Polar  
137 H10 (H10; Firmware 3.0.50, Polar Electro, Kempele, Finland), an electrode chest-strap heart rate  
138 monitor. The Polar H10 uses existing technology from its predecessor Polar H7 which has been  
139 validated as above 99% accurate compared to ECG in previous studies (20). The three PPG experimental  
140 devices were the Polar OH 1 (OH1; Firmware 2.0.10, Polar Electro, Kempele, Finland), Apple Watch 4  
141 (AW4; Watch OS 5.3.2, Apple, Inc., Cupertino, California) and Garmin Forerunner 945 (FR945; Firmware  
142 2.80, Garmin Ltd., Schaffhausen, Switzerland). The device placement locations were consistent between  
143 subjects with OH1 located on the right anterior forearm, AW4 on the right wrist, GF945 on the left wrist.  
144 The H10 was fitted on the anterior thorax at the level of the xiphoid process with conduction gel to  
145 ensure signal transmission.

#### 146 [Procedures](#)

147 Data collection for each subject was completed in a single session and devices were not moved from  
148 their specific placement location throughout the entirety of the session. Subjects arrived at the Applied  
149 Physiology Laboratory at Georgia State University or the headquarters of a local running club according  
150 to their preferred location. After subjects completed informed consent, investigators recorded  
151 anthropometric information including subject-described Fitzpatrick score for skin tone, body mass via  
152 calibrated digital scale, body fat percentage via 3-site skinfold test, age, and sex. Subjects were then  
153 verbally informed of the study protocol, which was a running and walking protocol completed on  
154 Woodway treadmills, a Pro XL at the university laboratory and a Desmo S at the local running club  
155 (Woodway USA, Inc., Waukesha, WI). Subjects reported a general training intensity level (intensity)  
156 described as moderate, high, very high, or elite intensity based upon personal preference and abilities.  
157 Walking and running intensities were then assigned by investigators based on this information. Details  
158 about the intensity levels are depicted in Table 1.

159 Table 1. Treadmill Intensities

|                                     | Intensity       |               |                  |               |
|-------------------------------------|-----------------|---------------|------------------|---------------|
| <u>Testing Condition</u>            | <u>Moderate</u> | <u>High</u>   | <u>Very High</u> | <u>Elite</u>  |
| 2 - Steady State Walk               | 2.5 MPH         | 2.7 MPH       | 3.0 MPH          | 3.3 MPH       |
| 3 - Steady State Run                | 5.0 MPH         | 6 MPH         | 7.0 MPH          | 8.0 MPH       |
| 4 - Dynamic<br>(Run/Faster/Fastest) | 5/5.5/6.0 MPH   | 6/6.7/7.3 MPH | 7/7.7/8.3 MPH    | 8/8.7/9.3 MPH |

160

#### 161 Testing Conditions

162 For each subject, data collection was completed for all 4 testing conditions in a single session. Each  
163 testing condition included 1 minute of quiet sitting both prior to and after the treadmill protocol. SED,  
164 WLK, and RUN were 7 minutes in length, including the quiet sitting. DYN was 12 minutes in length,  
165 including the quiet sitting. For SED, subjects remain seated and motionless for 5 minutes. For the WLK  
166 and RUN, subjects completed 5 minutes of activity at the assigned treadmill speed intensity, which  
167 investigators set manually for each trial. For DYN, a time-based running and walking protocol, each  
168 treadmill was identically pre-programmed with 4 different programs to adjust speed at specific time  
169 intervals according to the assigned intensity as seen in Table 1. Walking speed during DYN matched the  
170 same intensity speed as WLK condition. Between each testing condition, subjects rested for 5 minutes  
171 to allow heart rate to return to normal.

#### 172 Data Acquisition

173 Data from the OH1 and H10 were transmitted from the device via Bluetooth to an iPad Mini running the  
174 Performtek app (Valencell, Inc. Raleigh, North Carolina). The Performtek app allows for connection of  
175 multiple devices and records device data, including heart rate, for side-by-side comparison. Data from



176 the AW4 was downloaded to RunGap software (CTRL-N ApS, Skødstrup, Denmark) which was then  
177 converted to .csv format and imported to Excel. The AW 4 could not be adjusted to record at a specific  
178 frequency and required manual data alignment with the same time points of the criterion device for  
179 proper analysis. The GF945 data were downloaded as a raw data file (.tcx file) via device sync with  
180 Garmin Connect. The H10, OH1, and GF 945 were all programmed to record heart rate at 1 Hz. OH1,  
181 H10, and GF945 data were then converted to .csv and imported into a Microsoft Excel (Microsoft  
182 Corporation, Redmond Washington) spreadsheet for analysis.

### 183 [Statistical Analysis](#)

184 After being organized in Excel, data were imported into SPSS 27 (SPSS; IBM Corporation, Armonk, NY)  
185 for further analysis. Mean Absolute Difference (MAD) and Mean Absolute Percent Error (MAPE) were  
186 calculated for each device for each protocol in Excel. T-tests for the difference between experimental  
187 device and criterion device for each stage of each protocol were conducted in SPSS to determine mean  
188 difference and standard deviation. Pearson's R correlation and intraclass correlation (ICC) were  
189 calculated to determine general correlation between devices and absolute agreement between devices,  
190 respectively. Lastly, Bland-Altman plots were created with mean bias and upper and lower limits of  
191 agreement. ANSI/CTA standards deem any device with a MAPE  $\leq 10\%$  as valid.

## 192 [Results](#)

### 193 [Subject Characteristics](#)

194 Basic subject characteristics are presented in Table 2. Recruitment of the subject population was  
195 coordinated to adhere to the ANSI/CTA standards for device research such that the minimum  
196 percentages of subjects met criteria for Body Mass Index (BMI), Fitzpatrick Score (i.e., skin tone), and  
197 sex. The standards as of the ANSI/CTI-2065 were (over the age of 18), sex (no less than 40%  
198 male/female), skin tone (minimum 25% from lighter scale and minimum 25% from darker scale), and

199 body mass (minimum 10% above 25 kg/m<sup>2</sup> and minimum 10% below 20 kg/m<sup>2</sup>). Additionally, a  
200 minimum of 20 subjects is recommended.

201 Table 2. Subject characteristics

| <b><u>Sex</u></b> | <b><u>BMI</u><br/><u>(kg/m<sup>2</sup>)</u></b> | <b><u>Fitzpatrick</u><br/><u>Score 1-3</u><br/><u>(n)</u></b> | <b><u>Fitzpatrick</u><br/><u>Score 4-6</u><br/><u>(n)</u></b> | <b><u>Height</u><br/><u>(m)</u></b> | <b><u>Weight</u><br/><u>(kg)</u></b> | <b><u>Body Fat</u><br/><u>(%)</u></b> |
|-------------------|-------------------------------------------------|---------------------------------------------------------------|---------------------------------------------------------------|-------------------------------------|--------------------------------------|---------------------------------------|
| Male (n = 10)     | 24.86                                           | 6                                                             | 4                                                             | 1.73                                | 74.54                                | 13.23                                 |
| Female (n = 10)   | 23.72                                           | 8                                                             | 2                                                             | 1.64                                | 63.62                                | 28.01                                 |
| All Subjects      | 24.3                                            | 14                                                            | 6                                                             | 1.7                                 | 69.1                                 | 20.6                                  |

202

### 203 General Device Results

204 Results for all devices can be seen in Tables 3 and 4. More detailed device results based on specific test  
205 conditions can be seen in Appendix 1. Both MAD and MAPE are device HR to criterion HR comparisons  
206 for all subjects during the entire 7 or 12 minutes of each testing condition. The 7-minute testing  
207 conditions had approximately 420 data points (HR measurements) per subject and the 12-minute testing  
208 conditions had approximately 720 data points per subject. As the AW4 did not allow for 1Hz HR  
209 recording, data points were fewer resulting in approximately 220 data points per subject for the 7-  
210 minute protocols and approximately 365 data points per subject for the 12-minute protocol. MAPE  
211 must be  $\leq 10\%$  to be considered valid according to ANSI/CTA-2065 standards. Using this threshold,  
212 each device was considered valid for each condition tested, although the devices did produce differing  
213 results for both MAD and MAPE. Bland-Altman plots for each device's data aggregated across all  
214 conditions can be seen for AW4, FR945, and OH1 in Figures 1, 2, and 3, respectively. Device by test  
215 condition Bland-Altman plots can be seen in Appendix 1.

216 Table 3. Mean Absolute Deviation (MAD)

| Protocol  | Polar OH1 | Apple Watch 4 | Garmin FR945 |
|-----------|-----------|---------------|--------------|
| Sedentary | 1.31      | 1.33          | 2.03         |
| Walk      | 2.79      | 2.58          | 5.19         |
| Run       | 4.00      | 4.29          | 6.51         |
| Dynamic   | 2.60      | 2.44          | 7.18         |

217

218 Table 4. Mean Absolute Percent Error (MAPE)

| Protocol  | Polar OH1 | Apple Watch 4 | Garmin FR945 |
|-----------|-----------|---------------|--------------|
| Sedentary | 1.78%     | 1.89%         | 2.81%        |
| Walk      | 3.15%     | 3.18%         | 5.93%        |
| Run       | 3.43%     | 3.51%         | 5.25%        |
| Dynamic   | 2.05%     | 1.95%         | 5.47%        |

219

220 *Polar OH1*

221 The OH1 resulted in a MAD between 1.31 (SED) and 4.00 (RUN) with a MAPE between 1.78% (SED) and  
222 3.43% (RUN). The Bland Altman plot for the OH1 can be seen in Figure 1. The LoA for the OH1 ranged  
223 between -9.406 and 10.586 with a mean bias of .59. The ICC of the OH1 was .991 with 95% CI of .992  
224 and .991.

225 **Fig 1. Bland-Altman Plot of all protocols for Polar OH1** Mean bias of 0.59 with upper and lower limits of  
226 agreement of 10.586 and -9.406, respectively.

227 *Apple Watch 4*

228 The AW4 produced a MAD between 1.33 (SED) and 4.29 (RUN). The MAPE for the AW4 ranged between  
229 1.89% (SED) and 3.51% (RUN). The Bland Altman plot for the AW4 for all protocols (SED, WLK, RUN,  
230 DYN) can be seen in Figure 2. The overall Limits of Agreement (LoA) ranged from to -13.314 to 13.974

231 with a mean bias of .33. Intraclass Correlation (ICC) was high at .990 with a 95% Confidence Interval (CI)  
232 of .990 and .989, upper and lower, respectively. Pearson's r was .990.

233 **Fig 2. Bland-Altman Plot of all protocols for Apple Watch 4** Mean bias of 0.33 with upper and lower  
234 limits of agreement of 13.974 and -13.314, respectively.

#### 235 *Garmin Forerunner 945*

236 The FR945 results yielded a MAD between 2.03 (SED) and 7.18 (DYN) with a MAPE range between 2.81%  
237 (SED) and 5.93% (WLK). The Bland Altman plot for all protocols can be seen in Figure 3. The FR945  
238 produced LoA between -17.269 and 20.469 with a mean bias of 1.6. The ICC was .967 with a 95% CI of  
239 .970 and .965. Pearson's r was .969.

240 **Fig 3. Bland-Altman Plot of all protocols for Garmin Forerunner 945** Mean bias of 1.60 with upper and  
241 lower limits of agreement of 20.469 and -17.269, respectively.

#### 242 *Discussion*

##### 243 *ANSI/CTA Standards Validity*

244 The principal findings of our study were that HR measurement via PPG technology in the Polar OH1,  
245 Apple Watch 4, and Garmin Forerunner 945 met the criteria to be considered valid by the ANSI/CTA  
246 standards. All three devices had a MAPE <10% while being evaluated across a broad subject group  
247 comprised of adequate representation across various skin tones, BMI levels, and sex.

248 Over the past two decades, wearable fitness devices have progressed in both use and functionality  
249 resulting in a broad range of options for consumers. A major advancement is the integration of PPG  
250 technology into the devices. By establishing the proper color of the light-emitting diode and refining  
251 proprietary algorithms, manufacturers can now provide end-users with myriad physiological information

252 in a single device without the need for a chest strap. The devices used in this study all use similar PPG  
253 technology, primarily differing in only the number of diodes and the manufacturer's unique algorithms.  
254 The development of the ANSI/CTA standards for determining device validity defines a framework that  
255 generally allows for a more equitable and diverse application of the device characteristics to the total  
256 population. This study represents one of the first studies that has developed the study design in strict  
257 accordance with the ANSI/CTA standards. Subject selection was not random, but instead, individuals  
258 were specifically recruited to meet the minimum percent of subject group standards such that age, sex,  
259 skin tone and BMI were all adequately represented in the subject group. Additionally, exercise  
260 conditions were specifically designed to adhere to the standards, and subject input was utilized to  
261 appropriately set intensities across a very diverse group of subjects. Although specific analysis of  
262 appropriate intensity matching is beyond the scope of this research, visual analysis of the data suggests  
263 that all subjects performed each test condition in alignment with the information provided. Therefore,  
264 by implementing a strict study design and appropriately selecting subjects based on the prescribed  
265 framework, the results of this study can be broadly applied to the general population.

#### 266 [Comparison with Previous Studies](#)

267 Previous studies have attempted to determine validity for various PPG devices, although to our  
268 knowledge, this is the first study to strictly apply the ANSI/CTA standards to subject selection and study  
269 design. The devices in this study have been directly and indirectly studied in conjunction with other  
270 devices or using different methodologies. As the consumer electronics market is constantly progressing  
271 and new devices are introduced to consumers fairly frequently, direct device comparison is limited and  
272 requires inclusion of different versions or generations of the devices. Although device manufacturers  
273 have been researched extensively during the past 6 to 7 years, precise comparison between this study's  
274 devices and previous research is very limited. Of the devices tested in this study, the OH1 has had been

275 researched the most. This is most likely because the OH1 has stayed consistent during its lifetime  
276 whereas other products have had generational changes or complete updates to the product line. The  
277 original OH1 was released in 2017 with only one major upgrade to the OH1 Plus (allowed ANT+  
278 communication). At the same time, Apple has released 4 different Apple Watches, and Garmin  
279 progressively released new watches in the Forerunner series with the FR945 being released in late 2019.

#### 280 *Polar OH1*

281 Multiple studies have previously provided ample evidence of the validity of the OH1. Schubert et al.  
282 found the mean bias to be slightly higher than the current study (.59 versus .76) but a narrower LoA  
283 (-9.406 and 10.586 versus -3.83 to 5.35), but is limited in application as the study compared only a  
284 mean heart rate for a yoga session while also suffering from unbalanced subject sex selection (n=15, 3  
285 males) with limited BMI and Fitzpatrick Scale variation (3) A more recent study found a lower mean bias  
286 (.27) and narrower LoA (-4.68 to 5.22) than the current study (4). Direct comparison is difficult as  
287 subjects the previous study noted all subjects held the handrail potentially decreasing any motion  
288 artifact, and the study also lacked any diversity with Fitzpatrick Scale and BMI. A 2019 study assessing  
289 different activities resulted in lower biases for walking and running (.18 versus .41 and .37 versus 1.28,  
290 respectively) but this study was biased towards males (n=70, males = 54), did not report BMI, and  
291 although it referenced skin tone, specific subject representation of skin tone levels was not reported (6).  
292 Additionally, A more recent study has further confirmed the validity of the OH1 in various activities, and  
293 across all activities found a higher mean bias (1 versus .59), a broader LoA (-20 to 19 versus -9.406 to  
294 10.586) with a lower  $r$  (.957 versus .991) compared to the current study, but like other studies lacked  
295 subject information about skin tone and BMI (13).

#### 296 *Apple Watch 4*

297 Apple regularly releases new products on an annual basis. As such, direct assessment of the AW4 is  
298 difficult, but evaluation of previous versions is available in the research. Dooley at al. evaluated the

299 first-generation Apple Watch across a wide range of BMI and exercise intensities finding a higher MAPE  
300 for walking (5.60% versus 3.18%) and running (6.70% versus 3.51%) compared to the current study (7).  
301 Although the study utilized different treadmill walking and running intensities, the heart rate data was  
302 only recorded for a single time point and Fitzpatrick Scale was not recorded. In 2019 Hwang et al.  
303 researched the Apple Watch 2, revealing a much tighter LoA (-6.0 to 3.9 versus -13.314 to 13.974) but a  
304 slightly lower mean bias (-1.0 versus .330) than the current study, but Hwang used a model of  
305 tachycardia with electrical pacing so direct comparisons are difficult to determine (8). Nelson et al.  
306 released research concerning the Apple Watch 3 in 2019 (9), finding a higher mean bias (1.80 versus  
307 .330) and higher MAPE (5.86% versus 2.63%) than our study but Nelson's study was a single-subject  
308 free-living design comparing different devices. Lastly, Duking et al. investigated the AW4 but the  
309 authors did not calculate key validity metrics (MAD, MAPE, ICC) with only a slightly lower  $r$  (.97 versus  
310 .984) available for comparison to the current study (10). Only one of these studies actively recruited  
311 subjects with skin tone variations, but the delineation was limited to white and non-white and  
312 ethnicity/race, not a skin tone scale (7).

### 313 *Garmin Forerunner 945*

314 FR945 validity data is lacking in the literature. The prior device-specific research that is available  
315 generally concerns the Forerunner 235 versus this study's 945. In Dooley's 2017 study, the Garmin  
316 Forerunner 235 had large deviations from the criterion HR with as high as MAPE of 24.38% (2.81% to  
317 5.93% for the current study). In 2019, Stove et al. also completed research on Garmin Forerunner 235  
318 validity revealing much lower ICC values (.480 to .905 versus .895 to .973) compared to the current  
319 study, but had a limited number of heart rate data points as data was only recorded once per minute  
320 (11).

## 321 Device Differences

322 Although all devices tested were deemed valid, differences in MAD and MAPE for different devices did  
323 exist. Whether these differences are functionally important is determined by the consumer. In respect  
324 to the criterion, the OH1 and AW4 tended to have lower differences for MAD and MAPE values, as well  
325 as a higher ICC and narrower CI compared to the FR945. Similarly, the ICC and r were lower for the  
326 FR945 compared to the other two devices with the OH1 having a very slightly higher ICC and r than the  
327 AW4.

328 The reasons for these differences could be due to multiple factors. First, as previously mentioned, the  
329 devices all differ for functionality and intended use. Secondly, although each device was worn according  
330 to manufacturer's specifications, devices differed in wristband/armband material and the size of the  
331 recording device. The FR945 and AW4 are both wrist-worn monitors but differing styles and materials  
332 of the wristbands resulted in slightly different fitment for the devices on individual subjects due to  
333 variation in wrist diameter. The OH1 had the smallest recording device and was secured to the lower  
334 arm via a fabric elastic band. Although the technology for the PPG light-emitting diode, appears to be  
335 similar between devices, individual devices variances between the number of diodes and spacing of  
336 diodes is visually apparent. The most likely reason for the differences, though, is the manufacturer-  
337 specific algorithm that converts the PPG raw data to heart rate information. Other differences in  
338 proprietary technology, such as the device specific hardware and software for recording and processing  
339 also presumably exist.

## 340 Limitations

341 Although this study was conducted according to the current ANSI/CTA standards, certain limitations do  
342 exist. First, the subject group (n=20) is considered the minimum subject group size and minimum  
343 percentage for the specific parameters of BMI and Fitzpatrick Scale. Although adequate for ANSI/CTA



344 standards, future studies should consider a larger subject group so that those two parameters can be  
345 more intricately analyzed within the total subject group. Additionally, the results of this study can only  
346 be applied to the specific devices and their corporation-specific algorithms to compute heart rate from  
347 PPG signals. As the technology continues to advance, it is plausible that the corporations will refine the  
348 algorithms in attempts to improve validity. Lastly, the ANSI/CTA standards place limitations on the  
349 subject group such that individuals with tattoos in the sensor location should not be included in the  
350 study due to presumed alterations in how the photosensor reads the reflection of the capillary beds. As  
351 it can be argued that tattoos on the arm and wrist have become popularized as of late, the validity of  
352 these devices cannot be confirmed in this subgroup.

### 353 [Conclusions](#)

354 As consumers are consistently utilizing a variety of devices to track health metrics which rely on heart  
355 rate measurements, it is vital that the PPG recording technology and manufacturer proprietary  
356 algorithms properly represent the actual heart rate of the individual. As the end-consumer of these  
357 devices represents a wide range of subject characteristics, it is equally important that the devices  
358 correctly record heart rate across variations in age, skin tone, sex, and BMI. By utilizing the ANSI/CTA  
359 standards for heart rate recording devices, this and future studies can be more confident that the data  
360 recorded by the device can be utilized confidently by the majority of the population. In this study, one  
361 of the first to implement a study design in accordance with the ANSI/CTA standards, the Polar OH1,  
362 Apple Watch 4, and Garmin Forerunner 945 were all deemed valid in their measurement of heart rate.  
363 Consumers of various age, sex, body composition, and skin tone can be confident that the heart rate  
364 data presented to them is within a strict range for validity and represents their unique characteristics.

365

## 366 Acknowledgements

367 The authors would like to acknowledge Phung Tran, Robert Tippett, Jr., Shreya Kulkarni for their  
368 assistance in data collection. Additionally, the authors would like to acknowledge Greg Dodd for his  
369 assistance with data alignment between the AW4 and H10. Lastly, the authors would also like to thank  
370 the Dr. David E. Martin Sport Science Research Fund and the Atlanta Track Club for their respective  
371 financial and logistical contributions to the study.

## 372 Conflict of Interest

373 The authors state no conflict of interests.

374

## 375 Abbreviations

376 ANSI/CTA: American National Standards Institute/Consumer Technology Association

377 AW4: Apple Watch 4

378 BPM: Beats per minute

379 GF945: Garmin Forerunner Multi-function watch

380 H10: Polar H10 Chest Strap Heart Rate Monitor (criterion)

381 ICC: Intraclass correlation

382 MAD: Mean Absolute Deviation

383 MAPE: Mean Absolute Percent Error

384 OH1: Polar OH1 Armband Heart Rate Monitor

385 PPG: Photoplethysmography

386

387

## 388 References

- 389 1. Thompson WR. WORLDWIDE SURVEY OF FITNESS TRENDS FOR 2020. ACSM's Health & Fitness  
390 Journal. 2019;23(6):10-8.
- 391 2. Allen J. Photoplethysmography and its application in clinical physiological measurement. *Physiol*  
392 *Meas.* 2007;28(3):R1-39.
- 393 3. Schubert MM, Clark A, De La Rosa AB. The Polar (®) OH1 Optical Heart Rate Sensor is Valid  
394 during Moderate-Vigorous Exercise. *Sports Med Int Open.* 2018;2(3):E67-e70.
- 395 4. Hettiarachchi IT, Hanoun S, Nahavandi D, Nahavandi S. Validation of Polar OH1 optical heart rate  
396 sensor for moderate and high intensity physical activities. *PLoS ONE.* 2019;14(5):1-13.
- 397 5. Olstad BH, Zinner C. Validation of the Polar OH1 and M600 optical heart rate sensors during  
398 front crawl swim training. *PLoS One.* 2020;15(4):e0231522.
- 399 6. Hermand E, Cassirame J, Ennequin G, Hue O. Validation of a Photoplethysmographic Heart Rate  
400 Monitor: Polar OH1. *Int J Sports Med.* 2019;40(7):462-7.
- 401 7. Dooley EE, Golaszewski NM, Bartholomew JB. Estimating Accuracy at Exercise Intensities: A  
402 Comparative Study of Self-Monitoring Heart Rate and Physical Activity Wearable Devices. *JMIR Mhealth*  
403 *Uhealth.* 2017;5(3):e34.
- 404 8. Hwang J, Kim J, Choi KJ, Cho MS, Nam GB, Kim YH. Assessing Accuracy of Wrist-Worn Wearable  
405 Devices in Measurement of Paroxysmal Supraventricular Tachycardia Heart Rate. *Korean Circ J.*  
406 2019;49(5):437-45.
- 407 9. Nelson BW, Allen NB. Accuracy of Consumer Wearable Heart Rate Measurement During an  
408 Ecologically Valid 24-Hour Period: Intraindividual Validation Study. *JMIR Mhealth Uhealth.*  
409 2019;7(3):e10828.

- 410 10. Dürking P, Giessing L, Frenkel MO, Koehler K, Holmberg HC, Sperlich B. Wrist-Worn Wearables for  
411 Monitoring Heart Rate and Energy Expenditure While Sitting or Performing Light-to-Vigorous Physical  
412 Activity: Validation Study. *JMIR Mhealth Uhealth*. 2020;8(5):e16716.
- 413 11. Støve MP, Haucke E, Nymann ML, Sigurdsson T, Larsen BT. Accuracy of the wearable activity  
414 tracker Garmin Forerunner 235 for the assessment of heart rate during rest and activity. *J Sports Sci*.  
415 2019;37(8):895-901.
- 416 12. Gillinov S, Etiwy M, Wang R, Blackburn G, Phelan D, Gillinov AM, et al. Variable Accuracy of  
417 Wearable Heart Rate Monitors during Aerobic Exercise. *Med Sci Sports Exerc*. 2017;49(8):1697-703.
- 418 13. Muggeridge DJ, Hickson K, Davies AV, Giggins OM, Megson IL, Gorely T, et al. Measurement of  
419 Heart Rate Using the Polar OH1 and Fitbit Charge 3 Wearable Devices in Healthy Adults During Light,  
420 Moderate, Vigorous, and Sprint-Based Exercise: Validation Study. *JMIR Mhealth Uhealth*.  
421 2021;9(3):e25313.
- 422 14. Chow HW, Yang CC. Accuracy of Optical Heart Rate Sensing Technology in Wearable Fitness  
423 Trackers for Young and Older Adults: Validation and Comparison Study. *JMIR Mhealth Uhealth*.  
424 2020;8(4):e14707.
- 425 15. Baek S, Ha Y, Park HW. Accuracy of Wearable Devices for Measuring Heart Rate During  
426 Conventional and Nordic Walking. *Pm r*. 2020.
- 427 16. Preejith SP, Annamol A, Joseph J, Sivaprakasam M. Design, development and clinical validation  
428 of a wrist-based optical heart rate monitor. 2016 IEEE International Symposium on Medical  
429 Measurements and Applications (MeMeA). 2016:1-6.
- 430 17. Boonya-Ananta T, Rodriguez AJ, Ajmal A, Du Le VN, Hansen AK, Hutcheson JD, et al. Synthetic  
431 photoplethysmography (PPG) of the radial artery through parallelized Monte Carlo and its correlation to  
432 body mass index (BMI). *Scientific reports*. 2021;11(1):2570.

- 433 18. Sañudo B, De Hoyo M, Muñoz-López A, Perry J, Abt G. Pilot Study Assessing the Influence of Skin  
434 Type on the Heart Rate Measurements Obtained by Photoplethysmography with the Apple Watch. J  
435 Med Syst. 2019;43(7):195.
- 436 19. Addison PS, Jacquel D, Foo DMH, Borg UR. Video-based heart rate monitoring across a range of  
437 skin pigmentations during an acute hypoxic challenge. J Clin Monit Comput. 2018;32(5):871-80.
- 438 20. Cheatham SW, Kolber MJ, Ernst MP. Concurrent validity of resting pulse-rate measurements: a  
439 comparison of 2 smartphone applications, the polar H7 belt monitor, and a pulse oximeter with  
440 bluetooth. Journal of sport rehabilitation. 2015;24(2):171-8.
- 441

442 Appendix 1.

443 Polar OH1 Detailed Results

| <u>Polar OH1</u>     | <u>SED</u> | <u>WALK</u> | <u>RUN</u> | <u>DYN</u> | <u>ALL</u> |
|----------------------|------------|-------------|------------|------------|------------|
| MEAN                 | 0.290      | 0.410       | 1.280      | 0.470      | 0.590      |
| SD                   | 2.015      | 4.817       | 8.398      | 3.778      | 5.100      |
| LoA Upper            | 4.239      | 9.851       | 17.740     | 7.875      | 10.586     |
| LoA Lower            | -3.659     | -9.031      | -15.180    | -6.935     | -9.406     |
| LoA Range            | 7.899      | 18.883      | 32.920     | 14.810     | 19.992     |
|                      |            |             |            |            |            |
| ICC                  | 0.989      | 0.957       | 0.965      | 0.993      | 0.991      |
| 95% Confidence Lower | 0.989      | 0.955       | 0.962      | 0.993      | 0.991      |
| 95% Confidence Upper | 0.990      | 0.959       | 0.967      | 0.993      | 0.992      |
|                      |            |             |            |            |            |
| Pearson's R          | 0.990      | 0.958       | 0.966      | 0.993      | 0.991      |

444

445 **Fig 4. Bland-Altman Plot of Polar OH1 Sedentary Protocol.** Mean bias of 2.015 with upper and  
446 lower limits of agreement of 4.239 and -3.659, respectively.

447 **Fig 5. Bland-Altman Plot of Polar OH1 Walking Protocol.** Mean bias of 4.817 with upper and  
448 lower limits of agreement of 9.851 and -9.031, respectively

449 **Fig 6. Bland-Altman Plot of Polar OH1 Running Protocol.** Mean bias of 8.398 with upper and  
450 lower limits of agreement of 17.740 and -15.180 respectively.

451 **Fig 7. Bland-Altman Plot of Polar OH1 Dynamic Protocol.** Mean bias of 3.778 with upper and  
452 lower limits of agreement of 7.875 and -6.935, respectively.

453 Apple Watch 4 Detailed Results

| <u>Apple Watch 4</u> | <u>SED</u> | <u>WALK</u> | <u>RUN</u> | <u>DYN</u> | <u>ALL</u> |
|----------------------|------------|-------------|------------|------------|------------|
| MEAN                 | 0.170      | -0.880      | 1.580      | 0.420      | 0.330      |
| SD                   | 2.020      | 4.500       | 12.257     | 5.589      | 6.961      |
| LoA Upper            | 4.129      | 7.940       | 25.604     | 11.374     | 13.974     |
| LoA Lower            | -3.789     | -9.700      | -22.444    | -10.534    | -13.314    |
| LoA Range            | 7.918      | 17.640      | 48.047     | 21.909     | 27.287     |
|                      |            |             |            |            |            |
| ICC                  | 0.990      | 0.960       | 0.926      | 0.985      | 0.984      |
| 95% Confidence Lower | 0.989      | 0.956       | 0.921      | 0.984      | 0.984      |
| 95% Confidence Upper | 0.990      | 0.965       | 0.931      | 0.985      | 0.984      |
|                      |            |             |            |            |            |
| Pearson's R          | 0.990      | 0.962       | 0.927      | 0.985      | 0.984      |

454

455 **Fig 8. Bland-Altman Plot of Apple Watch 4 Sedentary Protocol.** Mean bias of 2.020 with upper  
456 and lower limits of agreement of 4.129 and -3.789, respectively.

457 **Fig 9. Bland-Altman Plot of Apple Watch 4 Walking Protocol.** Mean bias of 4.500 with upper  
458 and lower limits of agreement of 7.940 and -9.700, respectively.

459 **Fig 10. Bland-Altman Plot of Apple Watch 4 Running Protocol.** Mean bias of 12.257 with  
460 upper and lower limits of agreement of 25.604 and -22.444, respectively.

461 **Fig 11. Bland-Altman Plot of Apple Watch 4 Dynamic Protocol.** Mean bias of 5.589 with upper  
462 and lower limits of agreement of 11.374 and -10.534, respectively.

464 Garmin Forerunner 945 Detailed Results

| <u>Garmin FR945</u>  | <u>SED</u> | <u>WALK</u> | <u>RUN</u> | <u>DYN</u> | <u>ALL</u> |
|----------------------|------------|-------------|------------|------------|------------|
| MEAN                 | 1.020      | -0.710      | 2.740      | 2.620      | 1.600      |
| SD                   | 3.106      | 7.590       | 11.158     | 11.760     | 9.627      |
| LoA Upper            | 7.108      | 14.166      | 24.610     | 25.670     | 20.469     |
| LoA Lower            | -5.068     | -15.586     | -19.130    | -20.430    | -17.269    |
| LoA Range            | 12.176     | 29.753      | 43.739     | 46.099     | 37.738     |
|                      |            |             |            |            |            |
| ICC                  | 0.973      | 0.895       | 0.934      | 0.922      | 0.967      |
| 95% Confidence Lower | 0.963      | 0.890       | 0.922      | 0.912      | 0.965      |
| 95% Confidence Upper | 0.979      | 0.900       | 0.943      | 0.931      | 0.970      |
|                      |            |             |            |            |            |
| Pearson's R          | 0.975      | 0.896       | 0.938      | 0.930      | 0.969      |

465

466 **Fig 12. Bland-Altman Plot of Garmin Forerunner 945 Sedentary Protocol.** Mean bias of 3.106  
467 with upper and lower limits of agreement of 7.108 and -5.068, respectively.

468 **Fig 13. Bland-Altman Plot of Garmin Forerunner 945 Walking Protocol.** Mean bias of 7.590  
469 with upper and lower limits of agreement of 14.166 and -15.586, respectively.

470 **Fig 14. Bland-Altman Plot of Garmin Forerunner 945 Running Protocol.** Mean bias of 11.158  
471 with upper and lower limits of agreement of 24.610 and -19.130, respectively.

472 **Fig 15. Bland-Altman Plot of Garmin Forerunner 945 Dynamic Protocol.** Mean bias of 11.760  
473 with upper and lower limits of agreement of 20.469 and -17.269, respectively.



## Polar OH1 - Dynamic Protocol

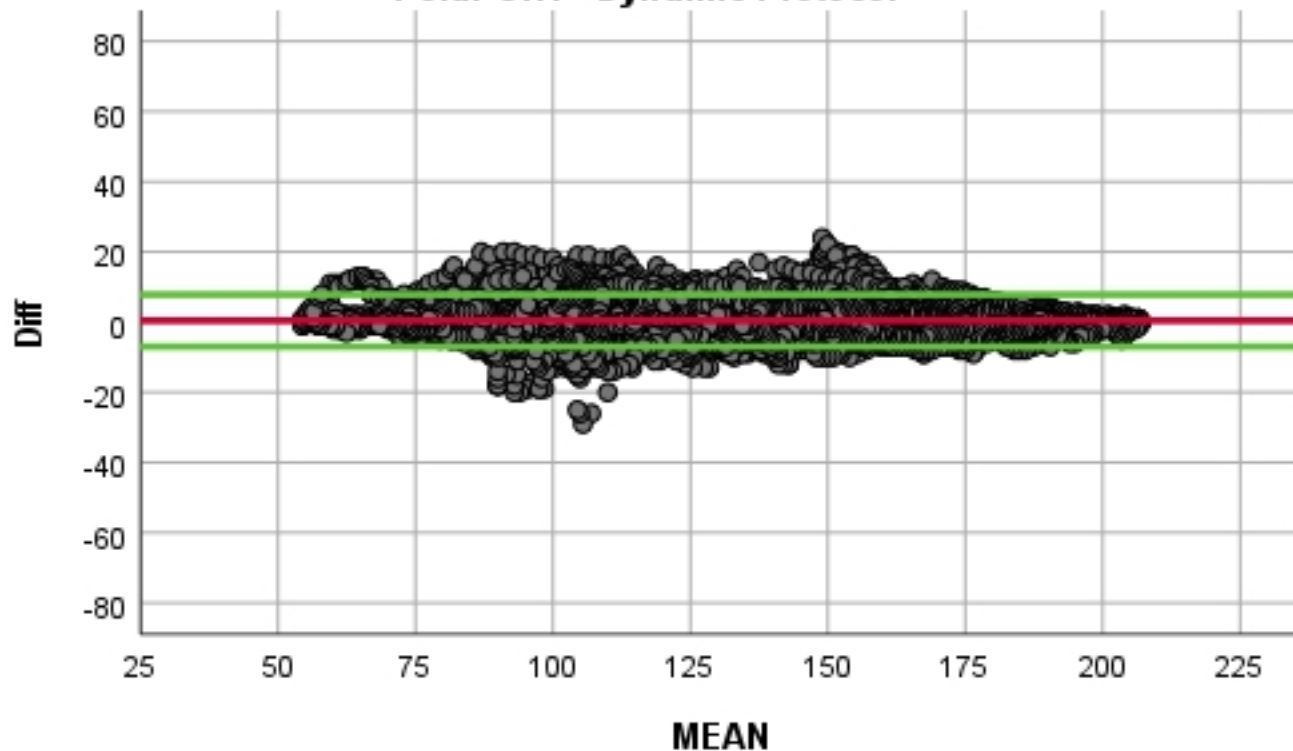

BA OH1 DYN

## Apple Watch 4 - Sedentary Protocol

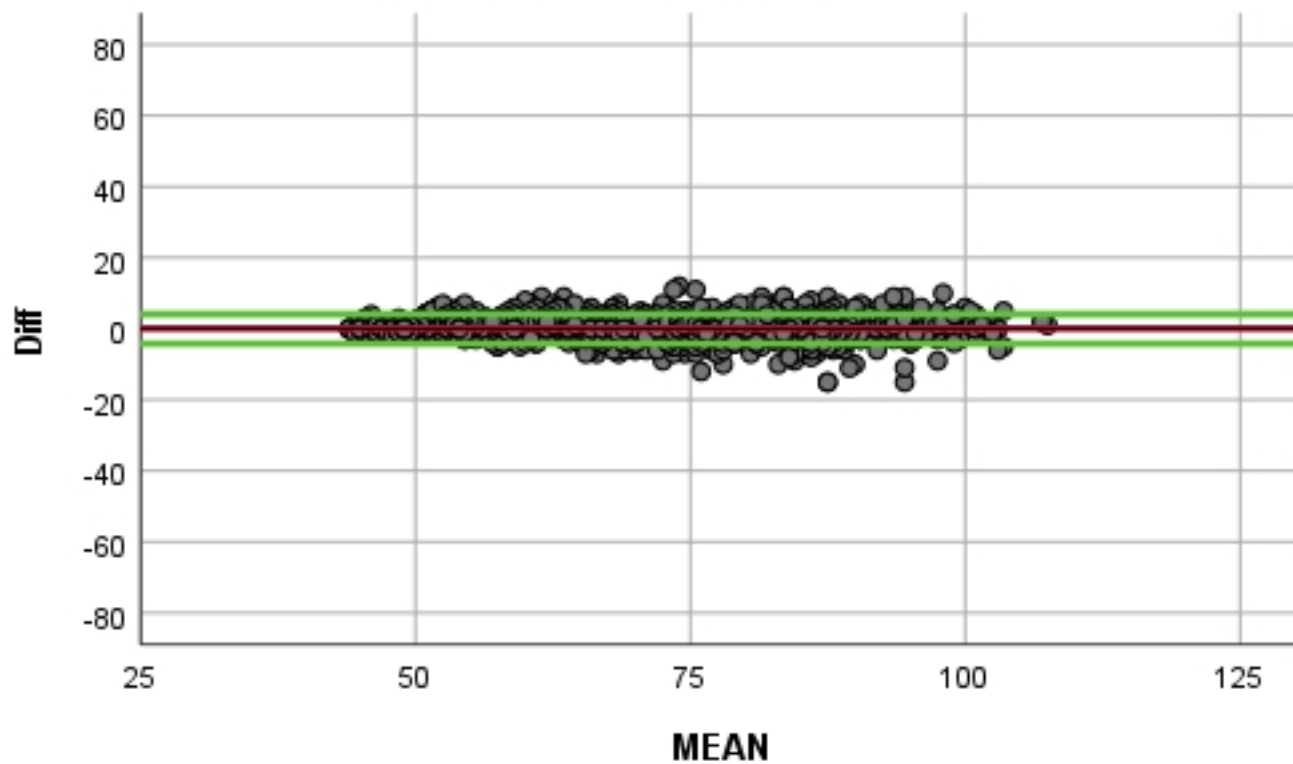

BA AW4 Sed

## Apple Watch 4 - Walking Protocol

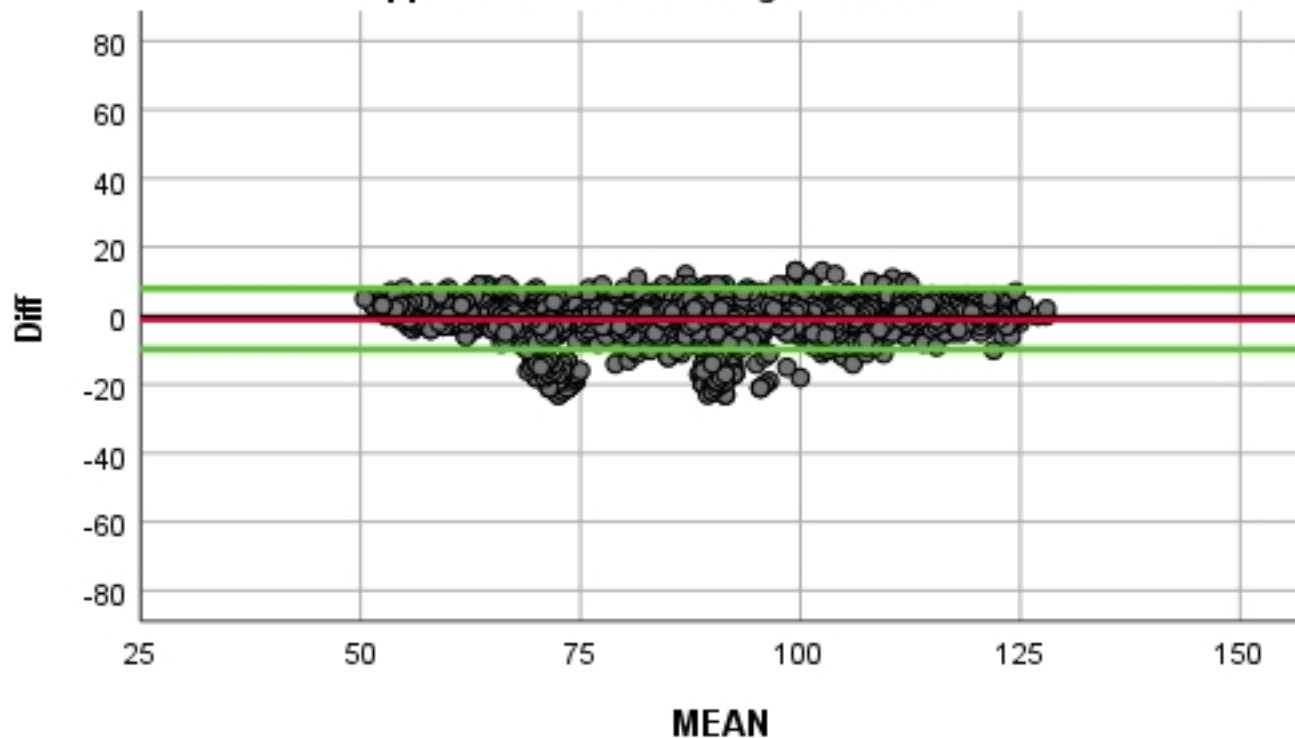

BA AW4

## Apple Watch 4 - Running Protocol

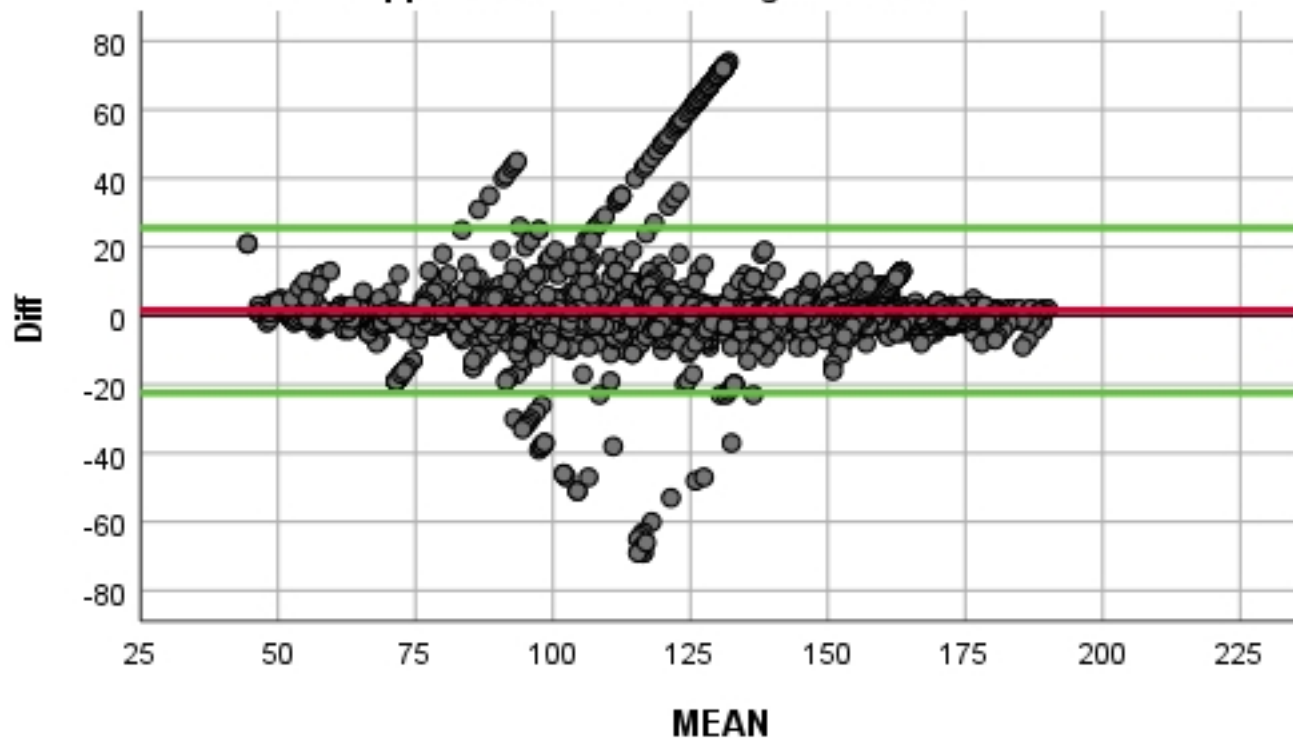

BA AW4 RUN

## Apple Watch 4 - Dynamic Protocol

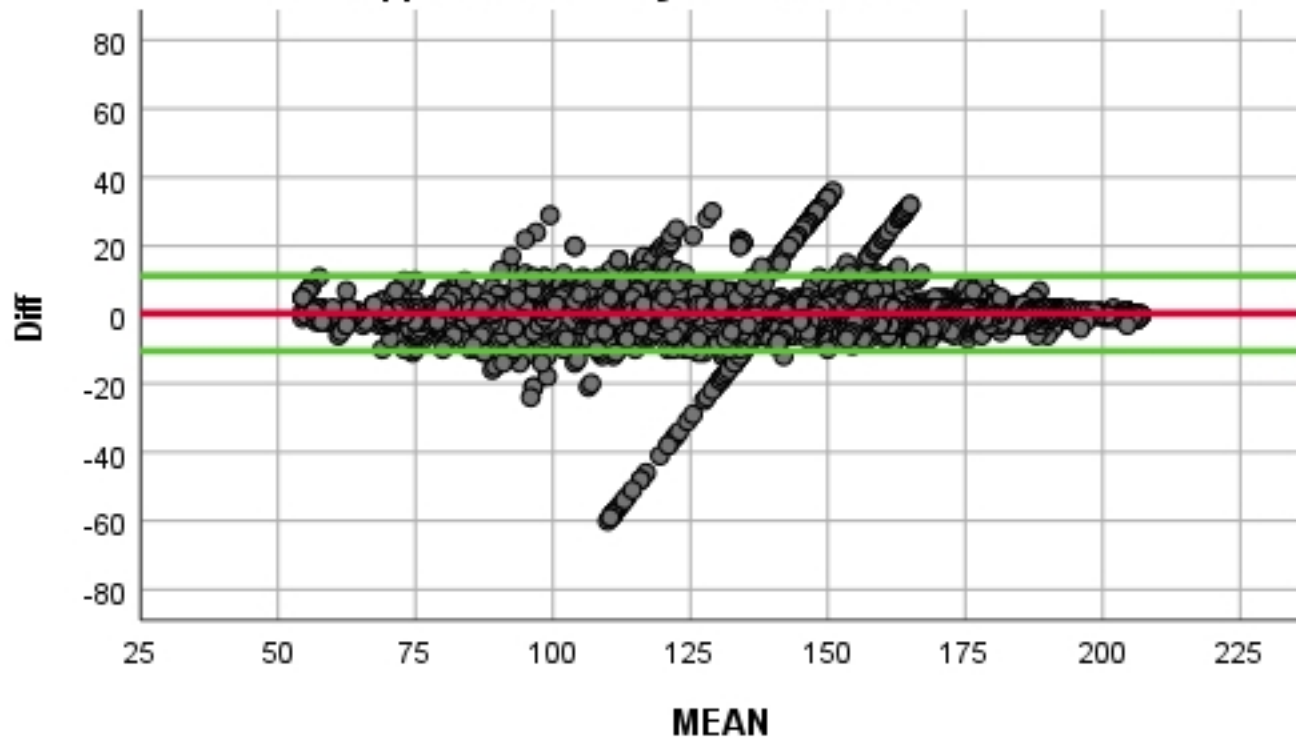

BA AW4 DYN

## Garmin Forerunner 945 - Sedentary Protocol

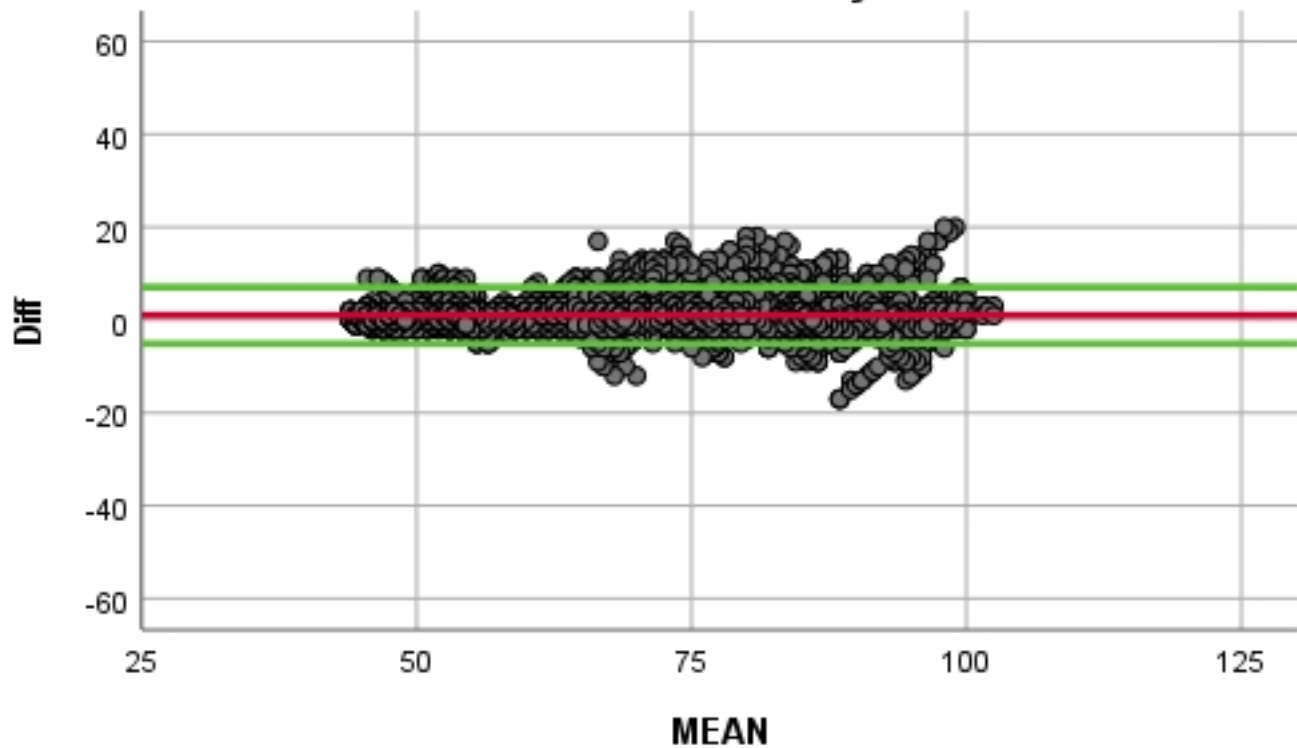

BA FR945 Sed

# Gamrin Forerunner 945 - Walking Protocol

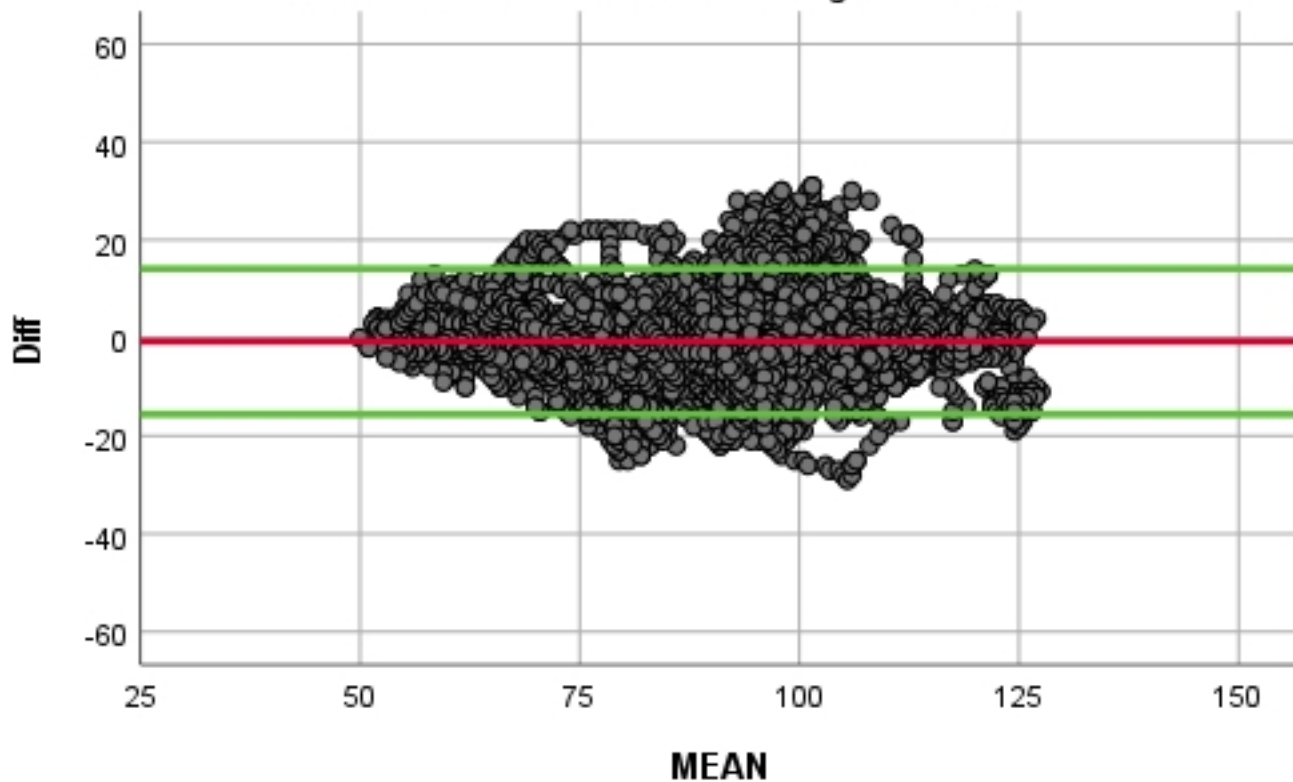

BA FR945 WLK

## Garmin Forerunner 945 - Running Protocol

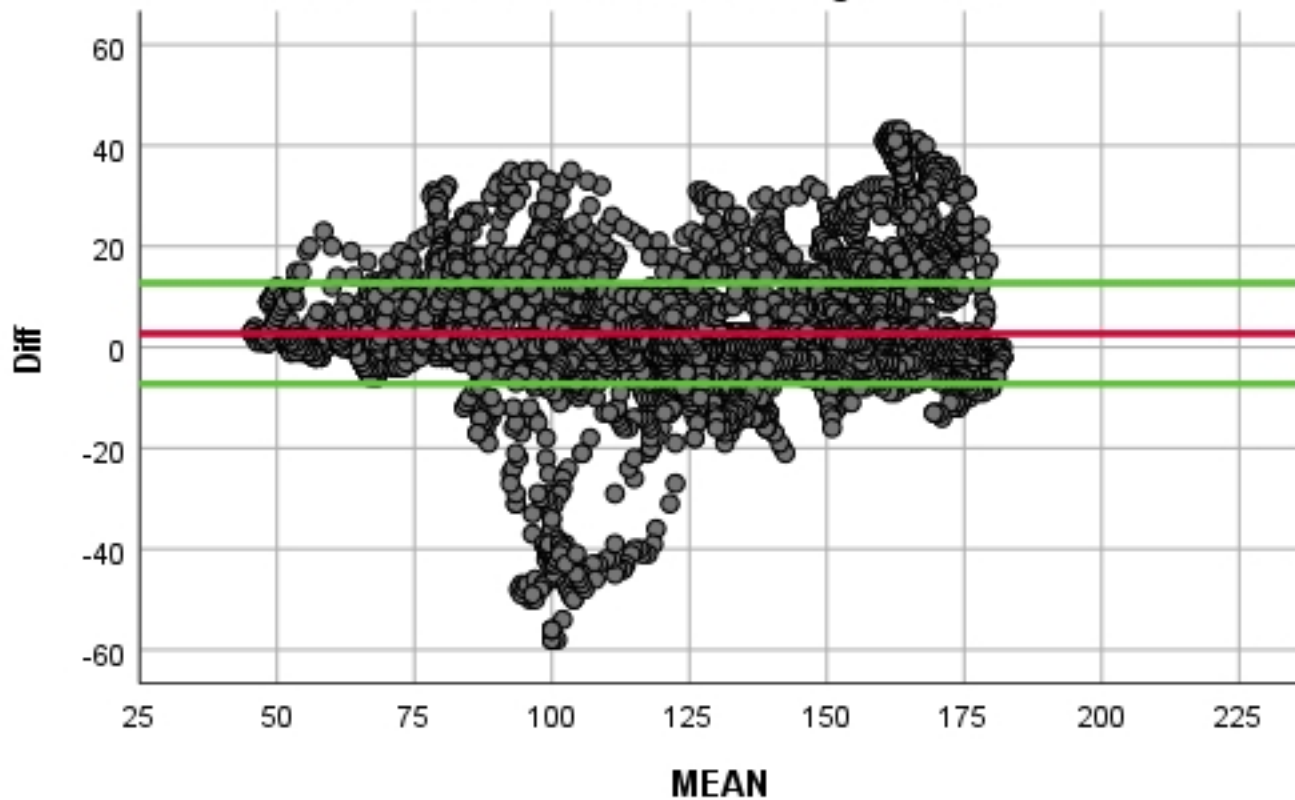

BA FR945 RUN



## Garmin Forerunner 945 - Dynamic Protocol

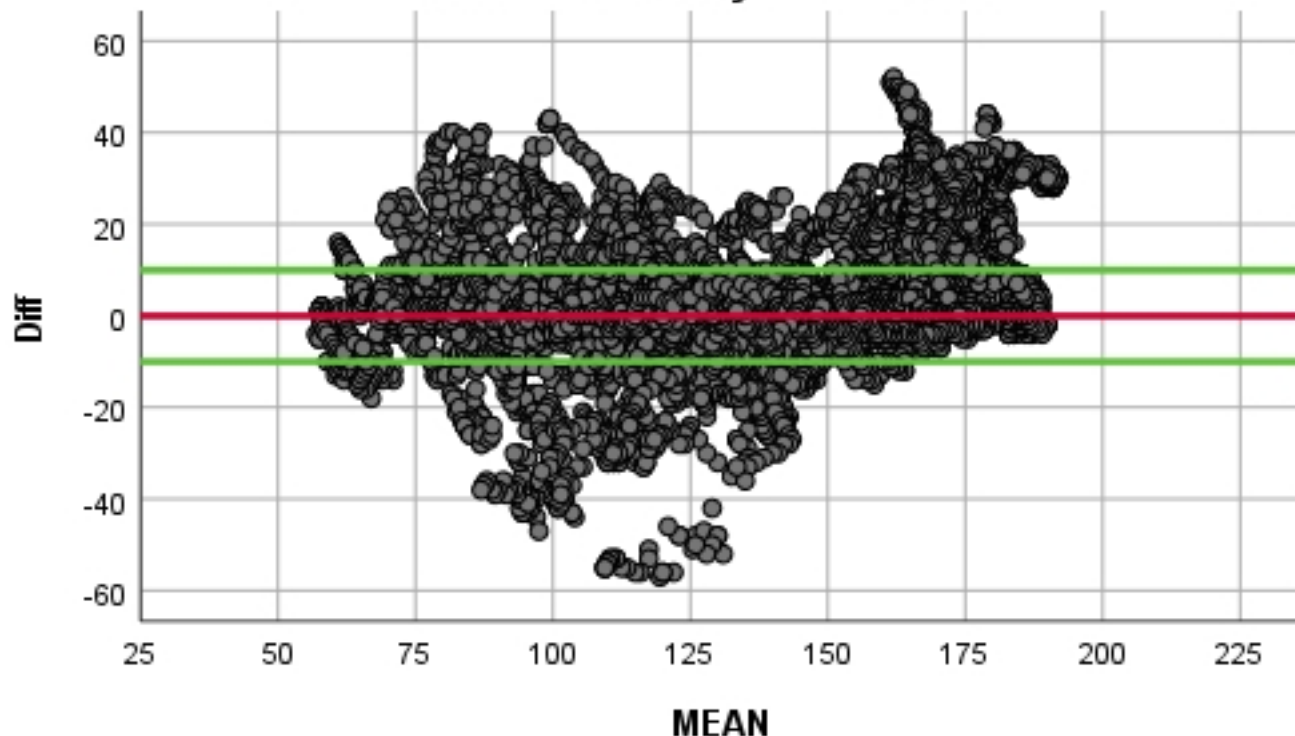

BA FR945 DYN

### Polar OH1 - All Protocols

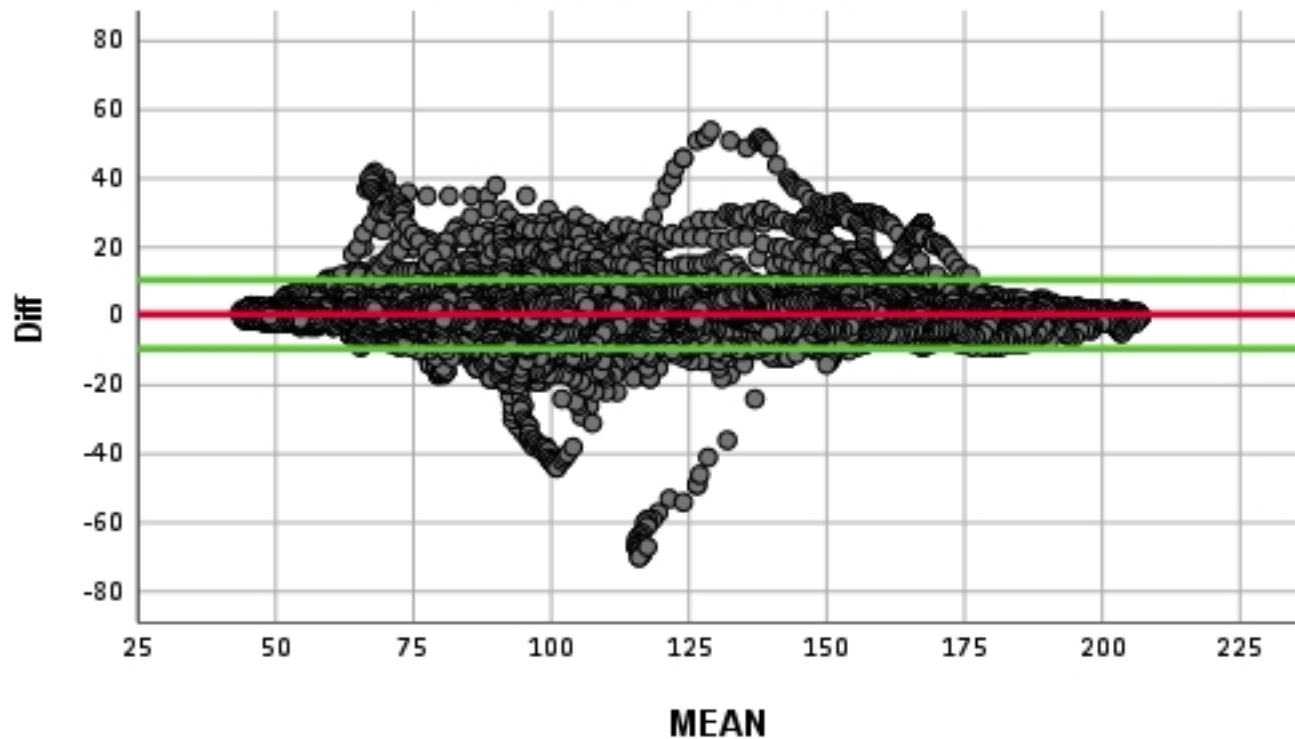

BA Plot All OH1

### Apple Watch 4 - All Protocols

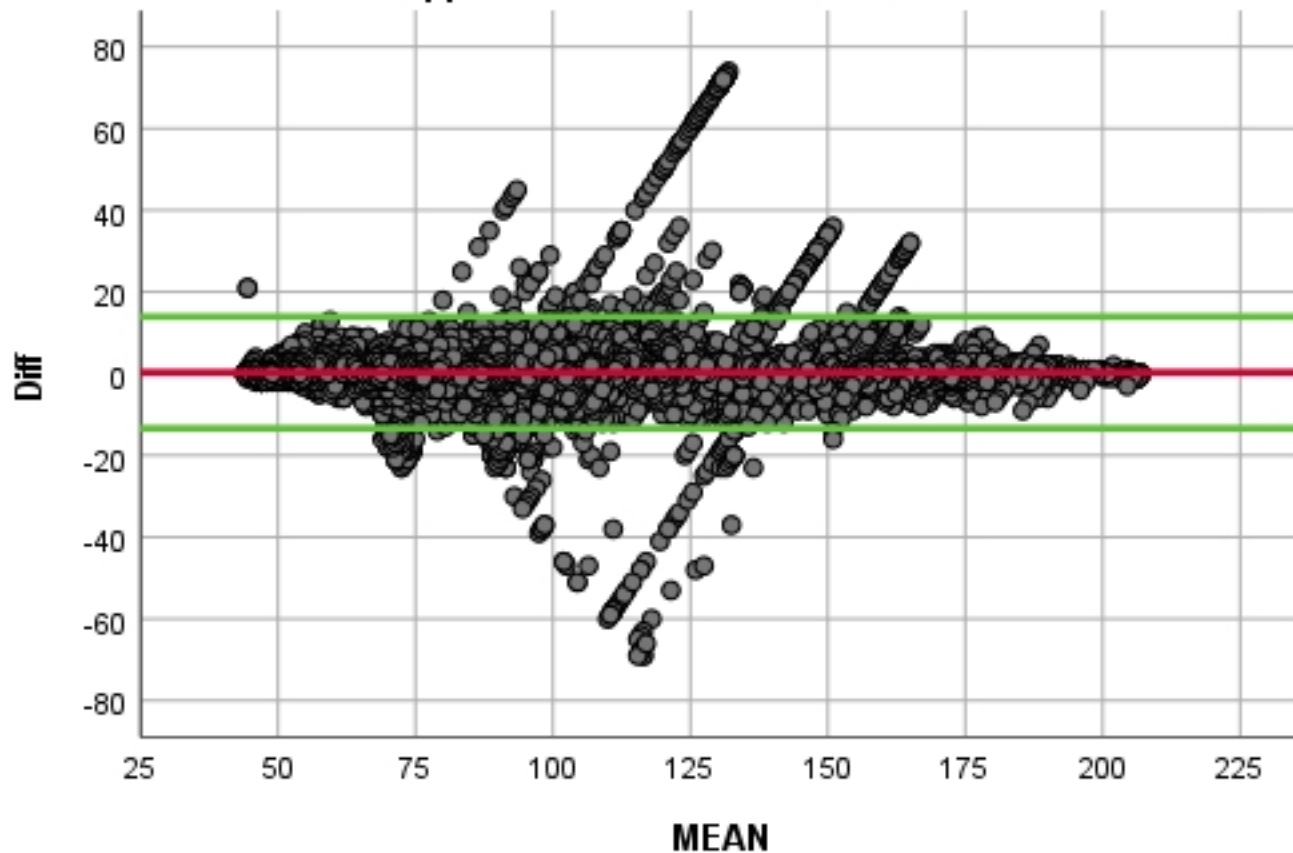

BA Plot All AW4

## Garmin Forerunner 945 - All Protocols

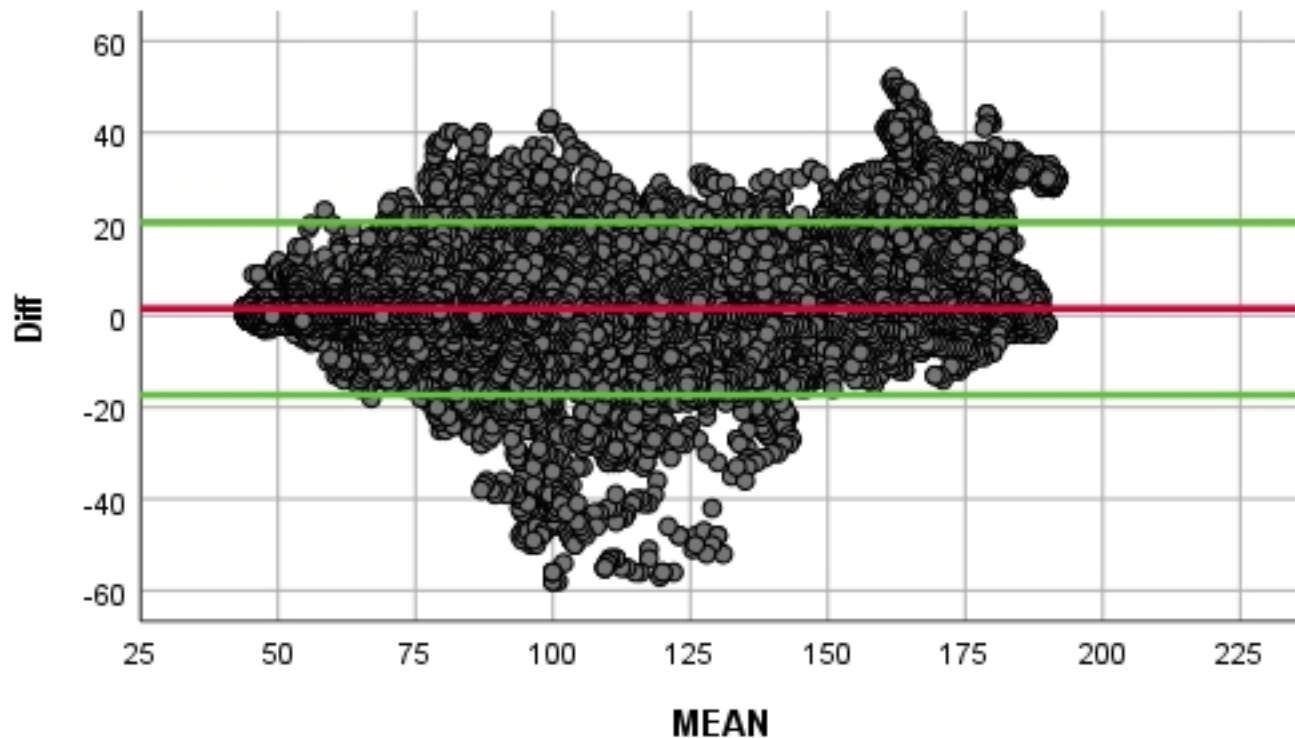

BA Plot All FR945

## Polar OH 1 - Sedentary Protocol

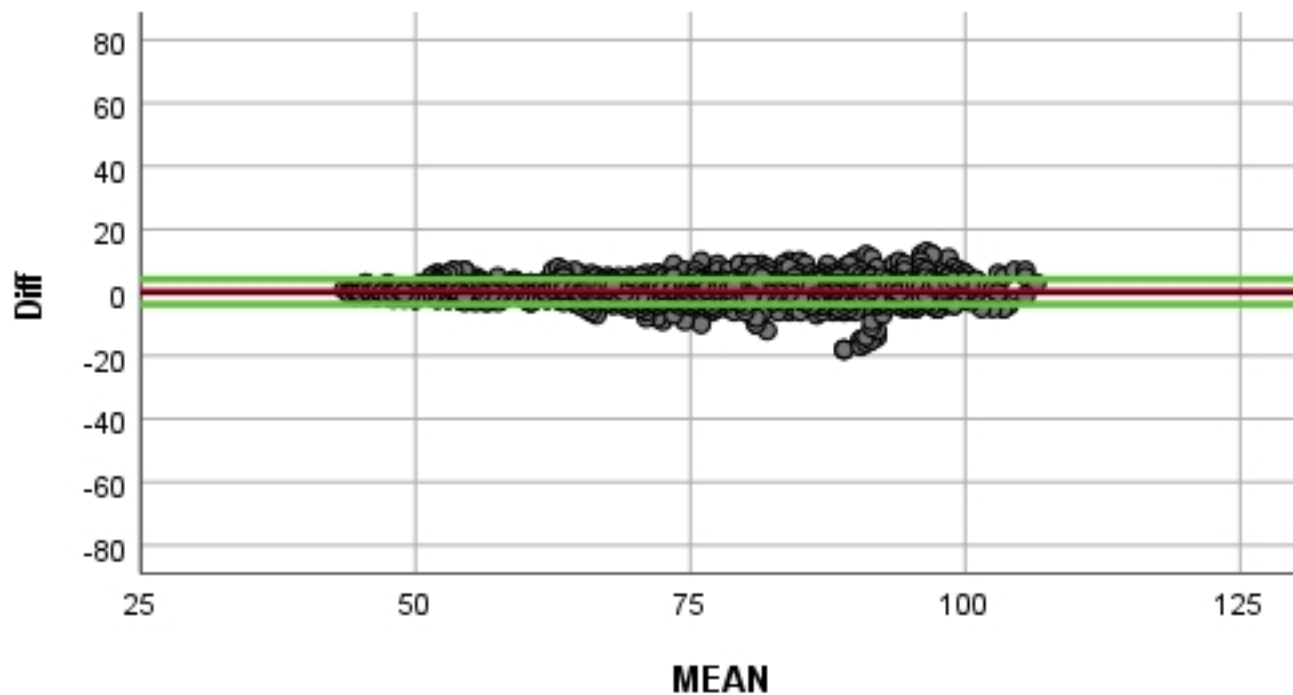

BA OH1 Sed

## Polar OH1 - Walk Protocol

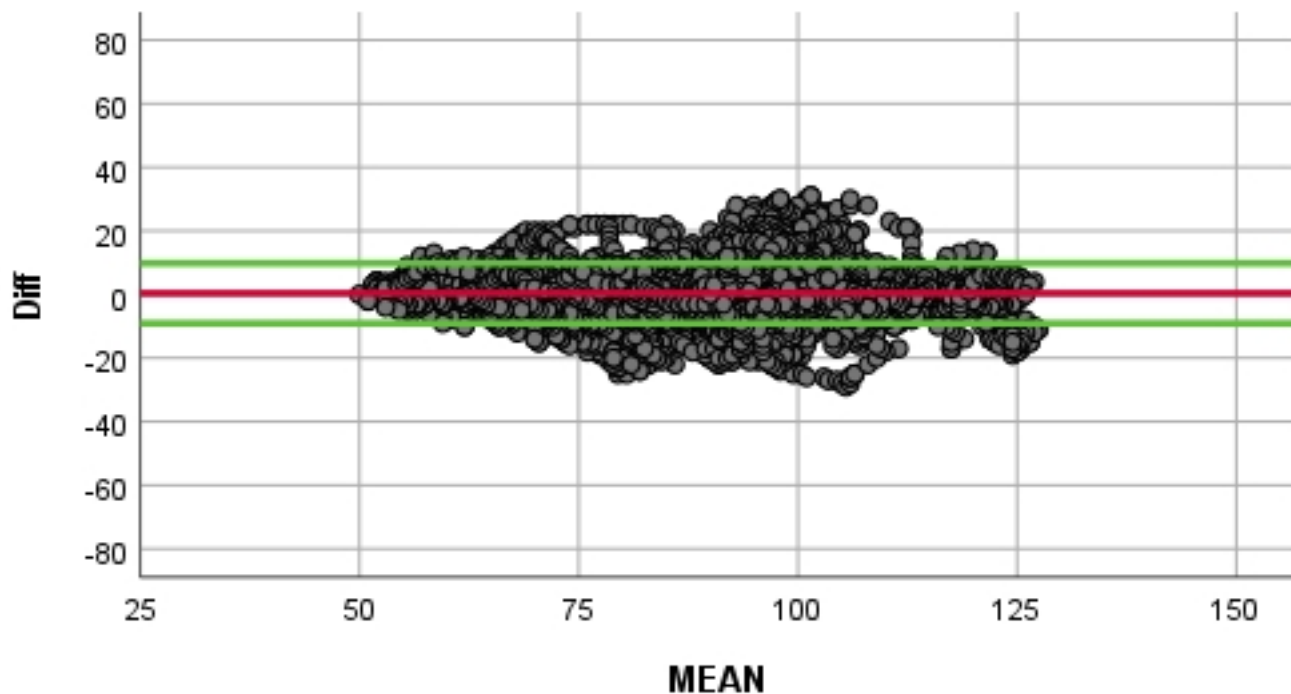

BA OH1 WLK

## Polar OH1 - Run Protocol

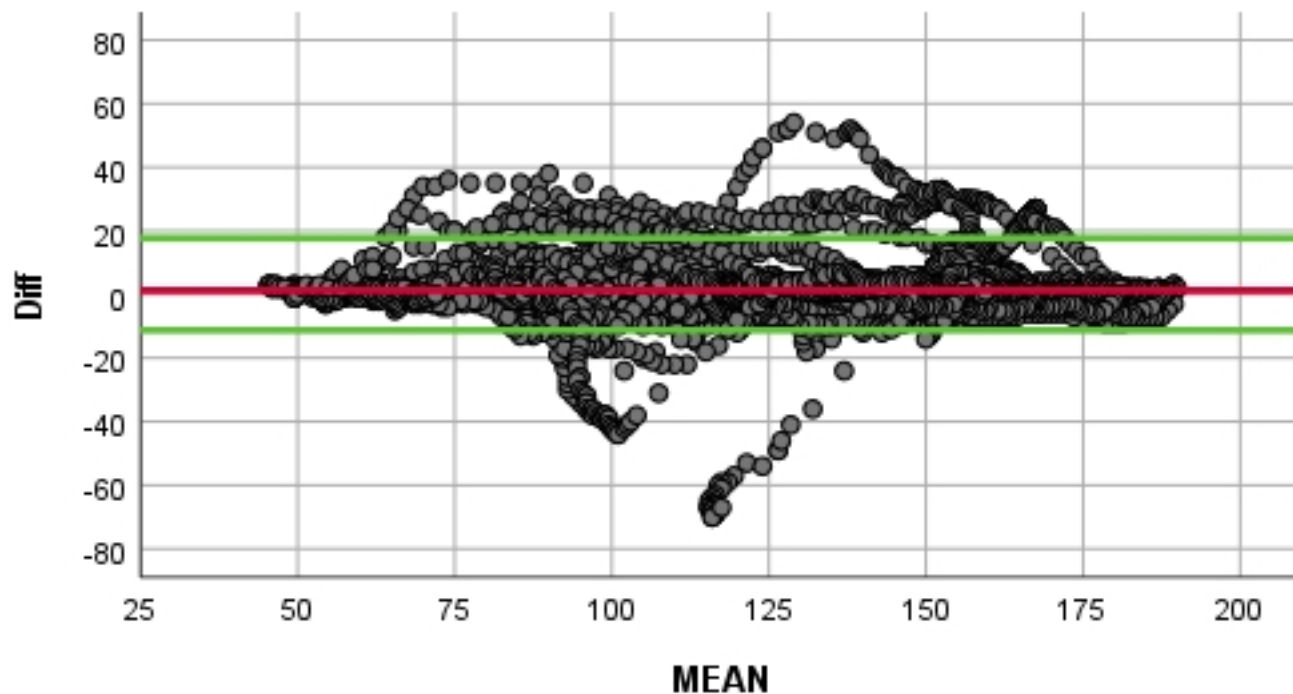

BA OH1 RUN
